# Supplementary material for: Prevalence and severity of menopause symptoms among perimenopausal and postmenopausal women aged 30-49 years in Gulele sub-city of Addis Ababa, Ethiopia
Source: PubMed Central journal article supplement (PMC5721600; doi:10.1186/s12905-017-0484-x), 2017-12-08
Supplement: 12905_2017_484_MOESM1_ESM.pdf [file 12905_2017_484_MOESM1_ESM.pdf]

## **I: English version questionnaire**

### **Consent form**

Hello! My Name is \_\_\_\_\_. I am a member of a research team in Addis Ababa University, College of Health Science, School of Allied Health Science, Department of Nursing and Midwifery. I would like to inform you that you and I would have a short discussion concerning our study. Before we go to our discussion, I will request you to listen carefully to what I am going to read to you about the purpose and general information of the study, and you will tell me whether you agree or disagree to participate in the study.

#### **Read the following paragraph for the participant.**

The purpose of we are conducting this study is to assess knowledge and attitude of women towards menopause among women aged 30-49 years in Gulele sub-city of Addis Ababa, Ethiopia. We are kindly requesting you for a little of your time, about 20 minutes, to be involved in this study. In the end, it is hoped that the information you give us could help to design appropriate reproductive health services for menopause women. We would like to assure you that your name will not be used and your responses, to any of the questions, will not be given to anyone else and no reports of the study will ever identify you. If the study is published, only information about the total group will appear. The interview is on voluntary. Your participation, non-participation or refusal to respond to the questions will have no effect now or in the future on services that you or any member of your family may receive from any service providers. Only volunteers will participate in this study.

Are you willing to participate in this study?

Yes

No

Signature\_\_\_\_\_

**Thank you!**

## Part I: Sociodemographic characteristics

| Question |                                                                                                            | Response                                                                                                                                                                                                                  | Code |
|----------|------------------------------------------------------------------------------------------------------------|---------------------------------------------------------------------------------------------------------------------------------------------------------------------------------------------------------------------------|------|
| 1.       | Questionnaire code                                                                                         | -----                                                                                                                                                                                                                     | C0   |
| 2.       | Woreda                                                                                                     | -----                                                                                                                                                                                                                     | C1   |
| 3.       | Ketena                                                                                                     | -----                                                                                                                                                                                                                     | C2   |
| 4.       | House number                                                                                               | -----                                                                                                                                                                                                                     | C3   |
| 5.       | Age                                                                                                        | ----- (in year)                                                                                                                                                                                                           | C5   |
| 6.       | Educational status                                                                                         | 1. Unable to read and write<br>2. Able to read and write<br>3. 1-4 grade<br>4. 5-8 grade<br>5. 9-10 grade<br>6. 11-12 grade<br>7. College/university student<br>8. Post graduate degree<br>88. Refused                    | C6   |
| 7.       | Ethnicity                                                                                                  | 1. Amhara<br>2. Oromo<br>3. Tigre<br>4. Gurage<br>5. Other (specify) -----<br>88. Refused                                                                                                                                 | C7   |
| 8.       | Marital status                                                                                             | 1. Single<br>2. Married<br>3. Divorced<br>4. Widowed<br>88. Refused                                                                                                                                                       | C8   |
| 9.       | Religion                                                                                                   | 1. Muslim<br>2. Orthodox<br>3. Protestant<br>4. Catholic<br>5. Other (specify)-----<br>88. Refused                                                                                                                        | C9   |
| 10.      | Occupation                                                                                                 | 1. House wife<br>2. Merchant<br>3. Civil servant<br>4. Daily laborer<br>5. Unemployed<br>6. NGO employee<br>7. Unpaid employee<br>8. Employed in private sector<br>9. Student<br>10. Other (specify):-----<br>88. Refused | C10  |
| 11.      | Taking the past year, can you tell me what the average earnings of the household have been within a month? | ----- ETB/month<br>88. Refused                                                                                                                                                                                            | C12  |

## Part II: reproductive health history

| Question |                                                                                            | Response                                                                                                                                                                                                                    | Code |
|----------|--------------------------------------------------------------------------------------------|-----------------------------------------------------------------------------------------------------------------------------------------------------------------------------------------------------------------------------|------|
| 1.       | When your first menstrual period started?                                                  | 1. Under 13 years old<br>2. 13 years old<br>3. Older than 13 years old<br>4. I didn't know                                                                                                                                  | T0   |
| 2.       | Do you have children?                                                                      | 1. Yes<br>2. No            If No, go to T3                                                                                                                                                                                  | T1   |
| 3.       | If yes, what is the number of your children? (Enter number)                                | No <input type="text"/> <input type="text"/> <input type="text"/> <input type="text"/>                                                                                                                                      | T2   |
| 4.       | Did you have any miscarriages, abortions or stillbirths?                                   | 1. Yes<br>2. No            If No, go to T5                                                                                                                                                                                  | T3   |
| 5.       | If yes, how many miscarriages, abortions or stillbirths you had experienced?               | No <input type="text"/> <input type="text"/> <input type="text"/> <input type="text"/>                                                                                                                                      | T4   |
| 6.       | Do you use contraceptive?                                                                  | 1. Yes<br>2. No            If No, go to T7                                                                                                                                                                                  | T5   |
| 7.       | If Yes, Which Method Are You Using?                                                        | 1. Female Sterilization<br>2. Injectable<br>3. Male Condom<br>4. Female Condom<br>5. Diaphragm/Foam/Jelly<br>6. Standard Days Method<br>7. Oral pills<br>8. Intra-uterine device<br>9. Other (specify) -----<br>88. Refused | T6   |
| 8.       | Are you pregnant now?                                                                      | 1. Yes        If yes , go to T10<br>2. No<br>3. Unsure                                                                                                                                                                      | T7   |
| 9.       | Are you breastfeeding now?                                                                 | 1. Yes<br>2. No                                                                                                                                                                                                             | T8   |
| 10.      | Do you have an operation to avoid having any more children?                                | 1. Yes<br>2. No                                                                                                                                                                                                             | T9   |
| 11.      | Do you currently perform strenuous exercise?                                               | 1. Yes<br>2. No                                                                                                                                                                                                             | T10  |
| 12.      | When was your last menstrual period?                                                       | 1. Days Ago----If yes , go to T15<br>2. Weeks Ago---If yes , go to T15<br>3. Months Ago--If yes , go to T15<br>4. Before Last Birth<br>5. 12 months ago<br>6. Has Had Hysterectomy<br>7. Never Menstruated                  | T11  |
| 13.      | How old were you at your last menstrual period? (ask this question for woman in menopause) | ------(age in years)                                                                                                                                                                                                        | T12  |
| 14.      | Do you medical reasons for stoppage of your menstrual period?                              | 1. Yes<br>2. No            If No, go to T15                                                                                                                                                                                 | T13  |

|     |                                                                                                                                                                               |                                                                                                                                                                                               |      |
|-----|-------------------------------------------------------------------------------------------------------------------------------------------------------------------------------|-----------------------------------------------------------------------------------------------------------------------------------------------------------------------------------------------|------|
| 15. | Mention your medical condition                                                                                                                                                | -----                                                                                                                                                                                         | T14  |
| 16. | How would you describe your current menstrual status?                                                                                                                         | 1. Regular menstrual periods in the last 3 Months. <b>If yes, go to A0</b><br>2. Irregular menstrual periods in the last 12 months<br>3. No menstrual periods in the last 12 months or longer | T15  |
| 17. | Which of the following symptoms apply to you at in the past one month? Please, mark the appropriate box for each symptom. For symptoms that do not apply, please mark 'none'. |                                                                                                                                                                                               |      |
|     |                                                                                                                                                                               | Response                                                                                                                                                                                      |      |
|     |                                                                                                                                                                               | <b>None-mild-moderate-severe-very severe</b>                                                                                                                                                  |      |
|     | Score =                                                                                                                                                                       | I -----I----- I -----I -----I<br>0      1      2      3      4                                                                                                                                |      |
|     | <b>Symptoms</b>                                                                                                                                                               |                                                                                                                                                                                               |      |
|     | Hot flushes, sweating                                                                                                                                                         | O   O   O   O   O                                                                                                                                                                             | T16a |
|     | Heart discomfort                                                                                                                                                              | O   O   O   O   O                                                                                                                                                                             | T16b |
|     | Sleep problems                                                                                                                                                                | O   O   O   O   O                                                                                                                                                                             | T16c |
|     | Depressive mood                                                                                                                                                               | O   O   O   O   O                                                                                                                                                                             | T16d |
|     | Irritability                                                                                                                                                                  | O   O   O   O   O                                                                                                                                                                             | T16e |
|     | Anxiety                                                                                                                                                                       | O   O   O   O   O                                                                                                                                                                             | T16f |
|     | Physical and mental exhaustion                                                                                                                                                | O   O   O   O   O                                                                                                                                                                             | T16g |
|     | Sexual problems                                                                                                                                                               | O   O   O   O   O                                                                                                                                                                             | T16h |
|     | Bladder problems                                                                                                                                                              | O   O   O   O   O                                                                                                                                                                             | T16i |
|     | Dryness of vagina                                                                                                                                                             | O   O   O   O   O                                                                                                                                                                             | T16j |
|     | Joint and muscular discomfort                                                                                                                                                 | O   O   O   O   O                                                                                                                                                                             | T16k |
| 18. | Total number symptoms apply to you at this time?                                                                                                                              | No <u>    </u>                                                                                                                                                                                | T17  |

### Part III: Knowledge on menopause

| Now, I am going to ask you some questions about your various concepts of menopause phenomenon. |                                                                                                  |                 |      |
|------------------------------------------------------------------------------------------------|--------------------------------------------------------------------------------------------------|-----------------|------|
| Question                                                                                       |                                                                                                  | Response        | Code |
| 1.                                                                                             | Do you think that at the time of menopause, menstruation stops suddenly?                         | 1. Yes<br>2. No | A0   |
| 2.                                                                                             | Do you know that women become menopausal at the age of 48-55 years?                              | 1. Yes<br>2. No | A1   |
| 3.                                                                                             | Do you know that hereditary background affects the time of menopause occurrence?                 | 1. Yes<br>2. No | A2   |
| 4.                                                                                             | Do you know that menopause occurs in women due to increasing sexual hormones?                    | 1. Yes<br>2. No | A3   |
| 5.                                                                                             | Do you know that thin people become menopause sooner?                                            | 1. Yes<br>2. No | A4   |
| 6.                                                                                             | Do you know that most of the women experience menstruation disorder before menopause occurrence? | 1. Yes<br>2. No | A5   |
| 7.                                                                                             | Do you know that most of the women experience hot flashes in the menopause period?               | 1. Yes<br>2. No | A6   |
| 8.                                                                                             | Do you think that menopause in women decreases genital infection?                                | 1. Yes<br>2. No | A7   |
| 9.                                                                                             | Do you believe that menopause in women increases weight and obesity?                             | 1. Yes<br>2. No | A8   |
| 10.                                                                                            | Do you feel that menopause symptoms are preventable and curable?                                 | 1. Yes<br>2. No | A9   |
| 11.                                                                                            | Do you think that menopause decreases Cardiovascular diseases in women?                          | 1. Yes<br>2. No | A10  |
| 12.                                                                                            | Do you know that menopause increases osteomalacia in women?                                      | 1. Yes<br>2. No | A11  |
| 13.                                                                                            | Do you know that menopause causes dryness and skin shrivel in women?                             | 1. Yes<br>2. No | A12  |
| 14.                                                                                            | Do you think that menopause causes different types of cancer in women?                           | 1. Yes<br>2. No | A13  |
| 15.                                                                                            | Do you know that sexualities change in menopausal women?                                         | 1. Yes<br>2. No | A14  |
| 16.                                                                                            | Do you know that smoking affects the time of menopause occurrence?                               | 1. Yes<br>2. No | A15  |

|     |                                                                                                           |                 |     |
|-----|-----------------------------------------------------------------------------------------------------------|-----------------|-----|
| 17. | Do you know that smoking does not affect the severity of symptoms and complications of menopause?         | 1. Yes<br>2. No | A16 |
| 18. | Do you think that menopause increases extra hair on women's face?                                         | 1. Yes<br>2. No | A17 |
| 19. | Do you know that menopause causes vaginal dryness and painful sexual intercourse?                         | 1. Yes<br>2. No | A18 |
| 20. | Do you know that menopause causes urinary frequency and dysuria?                                          | 1. Yes<br>2. No | A19 |
| 21. | Do you know that smoking and using alcohol are factor of increasing osteomalacia in women?                | 1. Yes<br>2. No | A20 |
| 22. | Do you know that regular physical activity is effective in preventing osteomalacia in menopausal women?   | 1. Yes<br>2. No | A21 |
| 23. | Do you know that menopause affects the power of concentration and memory of women?                        | 1. Yes<br>2. No | A22 |
| 24. | Do you think that the frequency and severity of hot flashes in menopausal women increase by time?         | 1. Yes<br>2. No | A23 |
| 25. | Do you know that the level of stress and depression feeling increase in menopausal women?                 | 1. Yes<br>2. No | A24 |
| 26. | Do you believe that during 1 year after complete stop of menstruation, pregnancy prevention is necessary? | 1. Yes<br>2. No | A25 |

## Part IV: Attitude on menopause phenomenon

| Now, I am going to ask you some questions about your Attitude on menopause phenomenon. |                                                                                              |                                                                           |      |
|----------------------------------------------------------------------------------------|----------------------------------------------------------------------------------------------|---------------------------------------------------------------------------|------|
| Question                                                                               |                                                                                              | Response                                                                  | Code |
| 1.                                                                                     | Menopause is the period of woman's loneliness                                                | 1. Completely agree<br>2. Agree<br>3. Disagree<br>4. completely disagree  | P0   |
| 2.                                                                                     | Menopause is the period of eradicating the problems of menstruation and preventing pregnancy | 1. Completely agree<br>2. Agree<br>3. Disagree<br>4. completely disagree  | P1   |
| 3.                                                                                     | Woman's menopause decreases husbands sexuality                                               | 1. Completely agree<br>2. Agree<br>3. Disagree<br>4. completely disagree  | P2   |
| 4.                                                                                     | Every woman can care for herself through training and necessary tend                         | 1. Completely agree<br>2. Agree<br>3. Disagree<br>4. completely disagree  | P3   |
| 5.                                                                                     | In the menopause period, interest and attention of woman to her husband decreases            | 1. Completely agree<br>2. Agree<br>3. Disagree<br>4. completely disagree  | P4   |
| 6.                                                                                     | Menopause is the beginning of the period of women's disablement                              | 1. Completely agree,<br>2. Agree<br>3. Disagree<br>4. completely disagree | P5   |
| 7.                                                                                     | Woman's life in the menopause period is more delightful than before menopause                | 1. Completely agree,<br>2. Agree<br>3. Disagree<br>4. completely disagree | P6   |
| 8.                                                                                     | Menopause decreases the grace of woman's appearance                                          | 1. Completely agree,<br>2. Agree<br>3. Disagree<br>4. completely disagree | P7   |
| 9.                                                                                     | Menopause is a usual and natural phenomenon in women's life                                  | 1. Completely agree,<br>2. Agree<br>3. Disagree                           | P8   |

|     |                                                                         |                                                                           |    |
|-----|-------------------------------------------------------------------------|---------------------------------------------------------------------------|----|
|     |                                                                         | 4. completely disagree                                                    |    |
| 10. | Menopause is the beginning of another life and second maturity of women | 1. Completely agree,<br>2. Agree<br>3. Disagree<br>4. completely disagree | P9 |

### Part V: Factors that affect knowledge and attitude of the women toward menopause

Now, I am going to ask you some questions about various factors that affect knowledge and attitude of the women toward menopause. This includes ease of talking to others about menopause, physical health, emotional health, source of information, number of friends and family member's respondent could talk to about menopause and menopausal status. Let's start with source of information.

| Question                                                                                 | Response                                                      | Code |
|------------------------------------------------------------------------------------------|---------------------------------------------------------------|------|
| 1. Have you ever received information on Menopause?                                      | 1. Yes<br>2. No      If No, go to Q3                          | Q0   |
| 2. If yes, from where did you get the information on Menopause?                          | 1. Friend                                                     | Q1a  |
|                                                                                          | 2. Medical care providers                                     | Q1b  |
|                                                                                          | 3. Books, Magazines, Journals                                 | Q1c  |
|                                                                                          | 4. Mass media (Radio, TV)                                     | Q1d  |
|                                                                                          | 5. Relatives                                                  | Q1e  |
|                                                                                          | 6. Educational sessions                                       | Q1f  |
|                                                                                          | 7. Community Elder                                            | Q1g  |
|                                                                                          | 8. Other, (specify) -----                                     | Q1h  |
| 3. Do you feel that talking to other about menopause is                                  | 1. very easy<br>2. easy<br>3. difficult<br>4. Very difficult. | Q2   |
| 4. How many friends you can talk in a very comfortable way about menopause.              | Number of friends <u>   </u>                                  | Q3   |
| 5. How many people in your family you can talk in a very comfortable way about menopause | Number of family <u>   </u>                                   | Q4   |



|    |                                                        |                                                                    |    |
|----|--------------------------------------------------------|--------------------------------------------------------------------|----|
| 6. | How do you perceive/feel your current emotional health | 1. Very poor<br>2. Poor<br>3. good<br>4. very good<br>5. excellent | Q5 |
| 7. | How do you perceive/feel your current physical health  | 1. Very poor<br>2. Poor<br>3. good<br>4. very good<br>5. excellent | Q6 |

## II: Amharic version questionnaire

### ቃለ መጠይቁ ከመጀመሩ በፊት የኢ-መደበኛ የቃል ስምምነት መጠየቂያ ቅጽ

ጤና ይስጥልኝ ስሜ----- ይባላል። የመጣሁት በአዲስ አበባ ዩኒቨርሲቲ የጤና ሳይንስ ኮሌጅ አላይድ የጤና ሳይንስ ትምህርት ቤት የሚድቀውና ነርሲንግ ትምህርት ክፍል የተማራማሪዎች ቡድን አባል ነኝ። በቅድሚያ ስለምሰራው ጥናት ትንሽ ላስተዋወቅዎትና ከዛ በኋላ ለጥናቱ የሚረዳኝ መረጃ ለማግኘት አጭር የወይይት ጊዜ ይኖረናል። ወይይታችንን ከመጀመራችን በፊት ግን አሁን የማይታወቅም ስለጥናቱ አላማና አጠቃላይ ሁኔታ የሚገልጸውን ጽሁፍ ሳይታወቅ በጥምር በማዳመጥ በሃሳቡ በጥናቱ ውስጥ ለመሳተፍ እንደምትስማሙ ወይም እንደማትስማሙ ትገልጭልኛለሽ።

ቀጣዩን ጽሁፍ ለተመረጠች መላሽ ይነበብ።

የዚህ ጥናት አላማ በአዲስ አበባ ከተማ ጉለሌ ክፍለ ከተማ የሚገኙ እድሜያቸው ከ30-49 የሆኑ ሴቶች ስለማረጥ ያላቸውን የእወቀትና አመለካከት ደረጃ መገምገም ነው። ስለሆነም ካለሽ ጊዜ ላይ በዚህ ጥናት ለመሳተፍ፣ ሀያ ደቂቃ ቆይታ እንዲኖረን ፈቃድሽ እንዲሆን በትህትና እጠይቃለሁ። ለጥናቱ የምትሰጠው መረጃ በአጠቃላይ ስለ የሚያርጡ ሴቶችን በተመለከተ በስነተዋልዶ ጤና ዘርፍ በሚደረገው እቅድ ስለሚጠቅም በቅድሚያ እናመሰግናለን። በዚህ ጥናት ላይ የምትሰጡ መረጃ እንዲሁም ስምሽ በሚስጥር የሚጠበቅ ሲሆን በሌላ ሰው እጅም ተላልፎ አይሰጥም ከዚህ ጥናት ወጭም አገልግሎት ላይ አይወልድም። የዚህ ጥናት ውጤት ለህትመት ቢበቃ እንኳን በአጠቃላይ ምርምር ስለተደረገበት ቡድን እንጂ የግለሰቦች ስምና መረጃ በፍጹም አይጠቀስም። ቃለመጠይቁ በፈቃደኝነት ላይ የተመሰረተ ነው። በዚህ ጥናት ላይ መሳተፍሽ፣ ለመሳተፍ አለመፍቀድሽ፣ ወይም መቃወምሽ ወደፊት አንቺ ወይም ከቤተሰቦችሽ አንዱ ከአገልግሎት ሰጪ ተቋማት የሚያገኘው ወይም የሚያጣው ምንም ነገር የለም። በዚህ ጥናት የሚሳተፉት በፍላጎት ብቻ ነው።

በዚህ ጥናት ለመሳተፍ ፈቃደኛ ነሽ?

[ ] ፈቃደኛ ነኝ [ ] ፈቃደኛ አይደለሁም ፊርማ-----

**አመሰግናለሁ!**

**ክፍል 1: የጥናቱ ተሳታፊዎች አጠቃላይ ማህበራዊ መረጃዎች**

| ጥያቄ                                                          | መልስ                                                                                                                                                                                                             | መለያ |
|--------------------------------------------------------------|-----------------------------------------------------------------------------------------------------------------------------------------------------------------------------------------------------------------|-----|
| 1. የመጠይቅ መለያ ቁጥር                                             | -----                                                                                                                                                                                                           | C0  |
| 2. ወረዳ                                                       | -----                                                                                                                                                                                                           | C1  |
| 3. ቀጠና                                                       | -----                                                                                                                                                                                                           | C2  |
| 4. የቤት ቁ.                                                    | -----                                                                                                                                                                                                           | C3  |
| 5. ዕድሜ                                                       | ----- በዓመት                                                                                                                                                                                                      | C5  |
| 6. የትምህርት ደረጃ                                                | 1. ማንበብና መጻፍ የማይችል<br>2. ማንበብና መጻፍ የሚችል<br>3. ከ1-4ኛ ክፍል<br>4. ከ5-8ኛ ክፍል<br>5. ከ9-10 ኛ ክፍል<br>6. ከ11-12 ክፍል<br>7. የኮሌጅ/ዩኒቨርሲቲ ተማሪ<br>8. ማስተርስ (ድህረ መሩቅ)<br>88. መናገር አልፏልግም                                       | C6  |
| 7. ብሔር                                                       | 1. አማራ<br>2. አሮሞ<br>3. ትግሬ<br>4. ጉራጌ<br>5. ሌላ ካለ (ይጠቀስ)-----<br>88. መናገር አልፏልግም                                                                                                                                 | C7  |
| 8. የጋብቻ ሁኔታ                                                  | 1. ያላገባ/ች<br>2. ያገባ/ች<br>3. የፈታ/ች<br>4. የሞተችበት/ባት<br>88. መናገር አልፏልግም                                                                                                                                            | C8  |
| 9. ሀይማኖት                                                     | 1. አርቶዶክስ<br>2. ሙስሊም<br>3. ካቶሊክ<br>4. ፕሮቴስታንት<br>5. ሌላ ካለ (ይጠቀስ)-----<br>88. መናገር አልፏልግም                                                                                                                        | C9  |
| 10. ባለፉት 12 ወራት ውስጥ ከሚከተሉት የትኛው የስራ ሁኔታዎን ይገልጻል?             | 1. የቤት አመቤት<br>2. ነጋዴ<br>3. የመንግስት ሰራተኛ<br>4. የቀን ሰራተኛ<br>5. ስራ ፈላጊ<br>6. መንግስታዊ ያልሆነ ድርጅት/ NGO / ሰራተኛ<br>7. ሳይከፈለው/ላት የሚሰራ/ምትሰራ ሰራተኛ<br>8. በግል ስራ የተሰማራች<br>9. ተማሪ<br>10. ሌላ ካለ (ይጠቀስ)-----<br>88. መናገር አልፏልግም | C10 |
| 11. በአማካይ ከባለፈው ዓመት ተነስተው የቤታችሁ ገቢ በወር ስንት እንደሆነ ሊነግሩኝ ይችላሉ? | ----- ብር/ወር<br>88. መናገር አልፏልግም                                                                                                                                                                                  | C12 |

**ክፍል 2: ስለ ስነ-ምግባር ጤና መረጃ**

| ጥያቄ                                                       | መልስ                                                                                                                                                                                              | መለያ |
|-----------------------------------------------------------|--------------------------------------------------------------------------------------------------------------------------------------------------------------------------------------------------|-----|
| 1. ወር አበባ መጀመሪያ ያየሽዉ መቼ ነዉ?                               | 1. ከ 13 አመት በታች<br>2. በ 13 አመትሽ<br>3. ከ 13 አመትሽ በኋላ<br>4. አላስታውስም                                                                                                                                | T0  |
| 2. ልጆች አሉሽ?                                               | 3. አዎ<br>4. የለኝም ----- ወደ T3 እለፊ                                                                                                                                                                 | T1  |
| 3. አዎ ከሆነ መልስሽ ስንት ልጆችአሉሽ?                                | በቁጥር <input type="text"/>                                                                                                                                                                        | T2  |
| 4. ከዚህ ቀደም በርግዝና ወቅት ችግር ደርሶብሽ ያዉቃል(ሞቶ የተወለደ፣ማስወረድ)?      | 1. አዎ<br>2. አይ----- ወደ T5 እለፊ                                                                                                                                                                    | T3  |
| 5. አዎ ከሆነ ስንት ጊዜ ደርሶ ያዉቃል(ሞቶ የተወለደ፣ማስወረድ)?                | በቁጥር <input type="text"/>                                                                                                                                                                        | T4  |
| 6. የወሊድ መቆጣጠሪያ ትጠቀሚያለሽ?                                   | 1. አዎ<br>2. አይ----- ወደ T7 እለፊ                                                                                                                                                                    | T5  |
| 7. አዎ ከሆነ ምን አይነት?                                        | 1. ዘላቂ/ቆሚ የወሊድ መቆጣጠሪያ<br>2. የሚወጋ<br>3. የወንድ ኮንዶም<br>4. የሴት ኮንዶም<br>5. ዲያፍራም /ፎም / ጄል<br>6. በክንድ የሚቀበሩ<br>7. በአፍ የሚወሰድ እንክብል<br>8. ማህጸን ዉስጥ የሚቀመጥ<br>9. ሌላ ካለ (ይጠቀስ)-----<br>10. 88. መናገር አልፈለገችም | T6  |
| 8. በአሁን ሰአት ነፍሰጡር ነሽ?                                     | 1. አዎ----- ወደ T10 እለፊ<br>2. አይ<br>3. እርግጠኛ አደለሁም                                                                                                                                                 | T7  |
| 9. በአሁን ሰአት ጡት ታጠቢያለሽ?                                    | 1. አዎ<br>2. አይ                                                                                                                                                                                   | T8  |
| 10. አሁን ካለሽ በላይ ልጅ እንዳይኖርሽ ብለሽ አጥራሲዮን አድርገሽ ታዉቂያለሽ?       | 1. አዎ<br>2. አይ                                                                                                                                                                                   | T9  |
| 11. በአሁን ሰአት ከፍተኛ የአካል እንቅስቃሴ ታደርጊያለሽ?                    | 1. አዎ<br>2. አይ                                                                                                                                                                                   | T10 |
| 12. ለመጨረሻ ጊዜ የወርአበባ ያየሽዉ መቼ ነዉ?                           | 1. ከቀናት በፊት-----ወደ T15 እለፊ<br>2. ከሳምንታት በፊት-----ወደ T15 እለፊ<br>3. ከወራት በፊት----- ወደ T15 እለፊ<br>4. ከ12 ወር በፊት<br>5. ማኅጸኔን ካስወጣው በዋላ<br>6. ከመጨረሻዉ ወሊድ በፊት<br>7. መጥቶብኝ አያዉቅም                          | T11 |
| 13. ላረጠች ሴት የሚቀርብ ጥያቄ) ለመጨረሻ ጊዜ የወርአበባ ያየሽዉ በስንት አመትሽ ነዉ? | ------( እድሜ በቁጥር ይገለጽ)                                                                                                                                                                           | T12 |
| 14. ለወር አበባሽ መቆም የህክምና/ከጤና ጋር የጠያያዝ ምክንያት አለሽ?            | 1. አዎ<br>2. አይ ----- ወደ T15 እለፊ                                                                                                                                                                  | T13 |
| 15. የህክምና/ከጤና ምክንያቱን ይጠቀስ                                 | -----                                                                                                                                                                                            | T14 |

|     |                                                               |                                                                                                                                            |     |   |   |   |      |
|-----|---------------------------------------------------------------|--------------------------------------------------------------------------------------------------------------------------------------------|-----|---|---|---|------|
| 16. | አሁን ያለሽበትን የወር አበባ ሁኔታ እንዴት ትገልጫለሽ?                           | 1. ላለፉት ሶስት ወራት ሳይዛባ የወር አበባዬ መጥቷል----- <b>ወደ A0 እለፊ</b><br>2. ላለፉት አስራሁለት ወራት በተዛባ ሁኔታ የወር አበባዬ መጥቷል<br>3. ላለፉት አስራሁለት ወራት የወር አበባዬ አልመጣም | T15 |   |   |   |      |
| 17. | ከሚከተሉት ምልክቶች ውስጥ የትኞቹ በአንቺ ላይ ታይቷል . ከተሰጡት ሳጥኖች ውስጥ ምልክት አድርገ |                                                                                                                                            |     |   |   |   |      |
|     | ምልክቶች                                                         | ምላሽ                                                                                                                                        |     |   |   |   |      |
|     | ውጤት =                                                         | የለም- ትንሽ- መካከለኛ -ከባድ - በጣም ከባድ<br>I-----I-----I -----I-----I<br><b>0      1      2      3      4</b>                                       |     |   |   |   |      |
|     | ትኩሳትና ማላብ                                                     | 0                                                                                                                                          | 0   | 0 | 0 | 0 | T16a |
|     | የልብ አለመርጋት                                                    | 0                                                                                                                                          | 0   | 0 | 0 | 0 | T16b |
|     | የእንቅልፍ ችግር                                                    | 0                                                                                                                                          | 0   | 0 | 0 | 0 | T16c |
|     | የመደበር ስሜት                                                     | 0                                                                                                                                          | 0   | 0 | 0 | 0 | T16d |
|     | መጎጫጎጭ                                                         | 0                                                                                                                                          | 0   | 0 | 0 | 0 | T16e |
|     | ወጥረት/ጭንቀት                                                     | 0                                                                                                                                          | 0   | 0 | 0 | 0 | T16f |
|     | አካላዊና/አእምሮአዊ መድከም/መዛል                                         | 0                                                                                                                                          | 0   | 0 | 0 | 0 | T16g |
|     | የወሲብ ችግር                                                      | 0                                                                                                                                          | 0   | 0 | 0 | 0 | T16h |
|     | የፊኛ ችግር                                                       | 0                                                                                                                                          | 0   | 0 | 0 | 0 | T16i |
|     | የብልት መድረቅ                                                     | 0                                                                                                                                          | 0   | 0 | 0 | 0 | T16j |
|     | የመገጣጠሚያና የጡንቻ ህመም                                             | 0                                                                                                                                          | 0   | 0 | 0 | 0 | T16k |
| 18. | በአንቺ ላይ የታዩት ምልክቶች ጠቅላላ ድምር?                                  | በቁጥር <input type="text"/>                                                                                                                  |     |   |   |   | T17  |

**ክፍል 3 : ስለ ማረጥ ያለ እውቀት**

| አሁን ስለማረጥ ክስተት የተለያዩ ጽንሰ ሀሳቦችን የተመለከቱ ጥያቄዎችን እጠይቅሻለሁ |                                                                   |                |     |
|------------------------------------------------------|-------------------------------------------------------------------|----------------|-----|
| ጥያቄ                                                  |                                                                   | መልስ            | መለያ |
| 1.                                                   | በማረጥ ወቅት የወርአበባ በድንገት ይቆማል ብለሽ ታስቢያለሽ?                            | 1. አዎ<br>2. አይ | A0  |
| 2.                                                   | ሴቶች በ48-55 አመታቸው ያርጣሉ ብለሽ ታስቢያለሽ?                                 | 1. አዎ<br>2. አይ | A1  |
| 3.                                                   | ከቤተሰብ የሚወረስ የዘር ሁኔታ የማረጥ ሁኔታ ላይ ተፅእኖ ይኖረዋል ብለሽ ታምኛለሽ?             | 1. አዎ<br>2. አይ | A2  |
| 4.                                                   | ማረጥ በወሲብ ሆርሞን መጨመር ምክንያት ይከሰታል ብለሽ ታስቢያለሽ?                        | 1. አዎ<br>2. አይ | A3  |
| 5.                                                   | ቀጭን ሰዎች ቶሎ ያርጣሉ ብለሽ ታምኛለሽ?                                        | 1. አዎ<br>2. አይ | A4  |
| 6.                                                   | ብዙ ሴቶች ከማረጣቸው በፊት የወርአበባ መዛባት ያጋጥማቸዋል ብለሽ ታስቢያለሽ?                 | 1. አዎ<br>2. አይ | A5  |
| 7.                                                   | በማረጥ ወቅት በአብዛኛው ሴቶች ትኩሳት እንደሚኖራቸው ታወቂያለሽ?                         | 1. አዎ<br>2. አይ | A6  |
| 8.                                                   | ማረጥ የብልት ኢንፌክሽን ይቀንሳል ብለሽ ታስቢያለሽ?                                 | 1. አዎ<br>2. አይ | A7  |
| 9.                                                   | ማረጥ ከብደትን ይጨምራል ብለሽ ታምኛለሽ?                                        | 1. አዎ<br>2. አይ | A8  |
| 10.                                                  | የማረጥ ምልክቶችን ማዳንና መቆጣጠር ይቻላል የሚል ስሜት አለሽ?                          | 1. አዎ<br>2. አይ | A9  |
| 11.                                                  | ማረጥ የልብ ችግሮችን ይቀንሳል ብለሽ ታስቢያለሽ?                                   | 1. አዎ<br>2. አይ | A10 |
| 12.                                                  | ማረጥ የሴቶችን አጥንት መሳሳት እንደሚጨምር ታወቂያለሽ?                               | 1. አዎ<br>2. አይ | A11 |
| 13.                                                  | ማረጥ በሴቶች የቆዳ መድረቅና መሟሽሽ ያስከትላል ብለሽ ታስቢያለሽ?                        | 1. አዎ<br>2. አይ | A12 |
| 14.                                                  | ማረጥ በሴቶች ላይ የተለያዩ የካንሰር አይነቶች እንዲከሰቱ ምክንያት ይሆናል ብለሽ ታስቢያለሽ?       | 1. አዎ<br>2. አይ | A13 |
| 15.                                                  | ወሲባዊ ልማዶችና ሁኔታዎች በማረጥ ወቅት ይቀየራሉ ብለሽ ታምኛለሽ?                        | 1. አዎ<br>2. አይ | A14 |
| 16.                                                  | ማጨስ የማረጫ ጊዜ ላይ ተጽእኖ ያሳድራል ብለሽ ታምኛለሽ?                              | 1. አዎ<br>2. አይ | A15 |
| 17.                                                  | ማጨስ የማረጥ ምልክቶችን በማወሳሰብና በማክበድ ለተጓዳኝ ህመሞች እንደሚያጋልጥ ታወቂያለሽ?         | 1. አዎ<br>2. አይ | A16 |
| 18.                                                  | ማረጥ በሴቶች ፊት ላይ ያለውን የፀጉር መጠን የጨምራል ብለሽ ታስቢያለሽ?                    | 1. አዎ<br>2. አይ | A17 |
| 19.                                                  | ማረጥን የመራቢያ አካል መድረቅና በወሲብ ጊዜ የህመም ስሜትን እንደሚፈጥር ታወቂያለሽ?            | 1. አዎ<br>2. አይ | A18 |
| 20.                                                  | ማረጥ የሴቶችን የሽንት መሽናት ድግግሞሽ መጨመርና በመሽናት ጊዜ የህመም ስሜት እንደሚፈጥር ታወቂያለሽ? | 1. አዎ<br>2. አይ | A19 |
| 21.                                                  | ማጨስና አልኮል መጠጦችን መጠጣት የአጥንት መሳሳትን በሴቶች ላይ ያስከትላል ብለሽ ታስቢያለሽ?       | 1. አዎ<br>2. አይ | A20 |

|     |                                                                            |                |     |
|-----|----------------------------------------------------------------------------|----------------|-----|
| 22. | ቋሚ የአካል ብቃት እንቅስቃሴ ማድረግ በማረጋገጥ ወቅት የሚመጣን የአጥንት መሳሳት ይከላከላል ብለሽ ታምኛለሽ?      | 1. አዎ<br>2. አይ | A21 |
| 23. | ማረጋገጥ የሴቶችን የትኩረትና የማስታወስ አቅም ተጽእኖ እንደሚያደርግ ታወቁያለሽ?                        | 1. አዎ<br>2. አይ | A22 |
| 24. | የሚያርጡ ሴቶች ከወትሮው በተለየ ሁኔታ እየጨመረ የሚመጣ ሰውነትን የማላብና ሙቀት መጨመር ይከሰታል ብለሽ ታስቢያለሽ? | 1. አዎ<br>2. አይ | A23 |
| 25. | ባረጠች ሴት ላይ የድብርትና የጭንቀት መጠን ከወትሮው ይጨምራል ብለሽ ታምኛለሽ?                         | 1. አዎ<br>2. አይ | A24 |
| 26. | የወርአበባ በቆመ ከእንድ አመት በኋላ እርግዝና መከላከያ መንገዶችን መጠቀም ያስፈልጋል ብለሽ ታምኛለሽ?          | 1. አዎ<br>2. አይ | A25 |

**ክፍል 4 : ስለ ማረጋገጥ ያለአመለካከት**

| አሁን ስለማረጋገጥ ክስተት ያለሽን አመለካከት የተመለከቱ ጥያቄዎችን እጠይቅሻለሁ |                                                           |                                                                |     |
|----------------------------------------------------|-----------------------------------------------------------|----------------------------------------------------------------|-----|
| ጥያቄ                                                |                                                           | መልስ                                                            | መለያ |
| 1.                                                 | ማረጋገጥ ለሴቶች የብቸኝነት ወቅት ነው                                  | 1. ሙሉ-በሙሉ እስማማለሁ<br>2. እስማማለሁ<br>3. አልስማማም<br>4. ሙሉ-በሙሉ አልስማማም | P0  |
| 2.                                                 | ማረጋገጥ ለሴቶች የወርአበባ ጭንቀትንና እርግዝናን የሚከላከሉበት ወቅት ነው           | 1. በጣም እስማማለሁ<br>2. እስማማለሁ<br>3. አልስማማም<br>4. በጣም አልስማማም       | P1  |
| 3.                                                 | ማረጋገጥ የባሎችን ወሲባዊ ፍላጎት ይቀንሳል                               | 1. በጣም እስማማለሁ<br>2. እስማማለሁ<br>3. አልስማማም<br>4. በጣም አልስማማም       | P2  |
| 4.                                                 | ሁሉም ሴቶች አካላዊ እንቅስቃሴ በማድረግ ለእራሳቸው አስፈላጊውን እንክብካቤ ማድረግ ይችላሉ | 1. በጣም እስማማለሁ<br>2. እስማማለሁ<br>3. አልስማማም<br>4. በጣም አልስማማም       | P3  |
| 5.                                                 | በማረጋገጥ ወቅት ለባሎች ያለው ፍላጎትና የሚደረገው ትኩረት ይቀንሳል               | 1. በጣም እስማማለሁ<br>2. እስማማለሁ<br>3. አልስማማም<br>4. በጣም አልስማማም       | P4  |
| 6.                                                 | ማረጋገጥ የሴቶች አቅምና ጉልበት መድከም የሚጀምርበት ወቅት ነው                  | 1. በጣም እስማማለሁ<br>2. እስማማለሁ<br>3. አልስማማም<br>4. በጣም አልስማማም       | P5  |
| 7.                                                 | ሴቶች ካረጡ በኋላ ህይወታቸው ከማረጋገጥ በፊት ከነበረው የበለጠ ደስተኛ ይሆናል        | 1. በጣም እስማማለሁ<br>2. እስማማለሁ<br>3. አልስማማም<br>4. በጣም አልስማማም       | P6  |
| 8.                                                 | ማረጋገጥ የአንድን ሴት አካላዊ ወበት ይቀንሳል                             | 1. በጣም እስማማለሁ                                                  | P7  |

|     |                                             |                                                                                                                              |    |
|-----|---------------------------------------------|------------------------------------------------------------------------------------------------------------------------------|----|
|     |                                             | <ul style="list-style-type: none"> <li>2. እስማማለሁ</li> <li>3. አልስማማም</li> <li>4. በጣም አልስማማም</li> </ul>                        |    |
| 9.  | ማረጥ በሴቶች ህይወት ውስጥ የሚከሰት ተፈጥሮአዊ ሁኔታ ነዉ.      | <ul style="list-style-type: none"> <li>1. በጣም እስማማለሁ</li> <li>2. እስማማለሁ</li> <li>3. አልስማማም</li> <li>4. በጣም አልስማማም</li> </ul> | P8 |
| 10. | ማረጥ አዲስ ህይወት የመጀመሪያና የሴቶች ሌላ የህይወት ምዕራፍ ነዉ. | <ul style="list-style-type: none"> <li>1. በጣም እስማማለሁ</li> <li>2. እስማማለሁ</li> <li>3. አልስማማም</li> <li>4. በጣም አልስማማም</li> </ul> | P9 |



**ክፍል 5 : ስለ ማረጋገጫ ያለ እውቀት እና አመለካከትን ተጽእኖ የሚያደርጉ**

| አሁን የሴቶችን በማረጋገጫ ላይ ያላቸውን እውቀትና አመለካከት ተጽእኖ አድራጊዎችን በተመለከተ የተወሰኑ ጥያቄዎችን አጠይቅሻለሁ። እነሱም ስለማረጋገጫ ክፍሎች ሰዎች ጋር ያለፍርሀት ማውራት፣ አካላዊ ጤንነት፣ የስሜት ደህንነት፣ የመረጃ ምንጮች፣ ስለማረጋገጫ ያለፍርሀት የሚያዋቁቸው የጓደኞችና የቤተሰብ አባላት ብዛት። |                                                                    |     |
|--------------------------------------------------------------------------------------------------------------------------------------------------------------------------------------------------------|--------------------------------------------------------------------|-----|
| ጥያቄ                                                                                                                                                                                                    | መልስ                                                                | መለያ |
| 1. ስለ ማረጋገጫ መረጃዎችን ሰምተሽ/ወይም አንብባሽ ታወቁያለሽ                                                                                                                                                               | 1. አዎ<br>2. አይ-----ወደ Q2 እለፈ                                       | Q0  |
| 2. መልሰሽ አዎ ከሆነ መረጃዎችን ያገኘሽዉ ምንጩ ከየት ነዉ?                                                                                                                                                                | 1. ከጓደኛ                                                            | Q1a |
|                                                                                                                                                                                                        | 2. ከህክምና አገልግሎት ሰጪዎች                                               | Q1b |
|                                                                                                                                                                                                        | 3. መጻሕፍት፣ መጽሔቶች፣ ጆርናሎች                                             | Q1c |
|                                                                                                                                                                                                        | 4. መገናኛ ብዙሀን(ራዲዮ፣ ቴሌቪዥን)                                           | Q1d |
|                                                                                                                                                                                                        | 5. ከዘመዶች                                                           | Q1e |
|                                                                                                                                                                                                        | 6. ከትምህርታዊ ፕሮግራሞች                                                  | Q1f |
|                                                                                                                                                                                                        | 7. ከጓደኛ                                                            | Q1g |
|                                                                                                                                                                                                        | 8. ከህክምና አገልግሎት ሰጪዎች                                               | Q1h |
| 3. ክፍሎች ሰዎች ጋር ስለ ማረጋገጫ ማውራት ?                                                                                                                                                                         | 1. በጣም ቀላል ነው<br>2. ቀላል ነው<br>3. ከባድ ነው<br>4. በጣም ከባድ ነው           | Q2  |
| 4. ስለ ማረጋገጫ ያለፍርሀት የምታወራቸው ምን ያህል ጓደኞች አሉሽ?                                                                                                                                                            | በቁጥር <input type="text"/>                                          | Q3  |
| 5. ስለ ማረጋገጫ ያለፍርሀት የምታወራቸው ምን ያህል ቤተሰቦች አሉሽ?                                                                                                                                                           | በቁጥር <input type="text"/>                                          | Q4  |
| 6. በአሁን ሰዓት ያለሽበትን የሥሜት ሁኔታ እንዴት ትገልጫለሽ                                                                                                                                                                | 1. በጣም ደስ የማይል<br>2. ደስ የማይል<br>3. በጣም ጥሩ<br>4. እጅግ በጣም ጥሩ         | Q5  |
| 7. አውን ያለሽበትን አካላዊ ጤና እንዴት ትገልጫለሽ                                                                                                                                                                      | 1. በጣም ህመምተኛ<br>2. ህመምተኛ<br>3. ደህና<br>4. በጣም ጤነኛ<br>5. እጅግ በጣም ጤነኛ | Q6  |
